# Supplementary material
Source: publisher figshare collection journal article supplement (https://acs.figshare.com/ndownloader/files/26627539)
Supplement: Supplementary file 1 [file 26627539]

Supporting Information

**Stable Cycle Performance of Phosphorus  
Negative Electrode in Lithium-Ion Batteries  
Derived From Ionic Liquid Electrolytes**

*Shubham Kaushik, Kazuhiko Matsumoto<sup>\*</sup>, Rika Hagiwara*

Graduate School of Energy Science, Kyoto University, Sakyo-ku, Kyoto 606-8501, Japan

\*Corresponding Author E-mail Address: k-matsumoto@energy.kyoto-u.ac.jp

Table S1 EIS fitting parameters ( $R_1$ ,  $R_2$ ,  $R_3$ ,  $R_4$ ,  $Q_2$ ,  $Q_3$ ,  $a_2$ ,  $a_3$ , and  $a_4$ ) during charge-discharge cycling for the Li|P/AB half-cell (1st, 3<sup>rd</sup>, and 10th cycle) using Org<sub>PF6</sub>, Org<sub>FSA</sub>, Org<sub>FEC</sub>, and IL<sub>2:8</sub> (see Figure S6(c-f) for the spectra).

| Electrolyte                             | Cycle | Resistance ( $\Omega$ ) |       |       |       | CPE ( $F s^{(a-1)}$ ) |       |                       |       |                       |       |
|-----------------------------------------|-------|-------------------------|-------|-------|-------|-----------------------|-------|-----------------------|-------|-----------------------|-------|
|                                         |       | $R_1$                   | $R_2$ | $R_3$ | $R_4$ | $Q_2$                 | $a_2$ | $Q_3$                 | $a_3$ | $Q_4$                 | $a_4$ |
| half-cell Li P/AB<br>Org <sub>PF6</sub> | 1     | 9.76                    | 3.69  | 13.75 | 0.97  | $6.92 \times 10^{-6}$ | 0.944 | $0.11 \times 10^{-3}$ | 0.804 | $3.78 \times 10^{-3}$ | 0.978 |
|                                         | 3     | 6.34                    | 10.16 | 1.53  | 1.08  | $0.24 \times 10^{-3}$ | 0.619 | $6.57 \times 10^{-3}$ | 0.983 | $0.22 \times 10^{-3}$ | 0.771 |
|                                         | 10    | 5.09                    | 17.08 | 1.78  | 0.42  | $0.28 \times 10^{-3}$ | 0.598 | $0.32 \times 10^{-3}$ | 1.000 | $0.14 \times 10^{-2}$ | 0.495 |
| half-cell Li P/AB<br>Org <sub>FSA</sub> | 1     | 25.48                   | 9.38  | 15.33 | 0.07  | $0.43 \times 10^{-3}$ | 0.560 | $0.24 \times 10^{-3}$ | 0.652 | $7.14 \times 10^{-3}$ | 0.875 |
|                                         | 3     | 22.40                   | 7.01  | 14.15 | 2.29  | $1.04 \times 10^{-3}$ | 0.550 | $0.25 \times 10^{-3}$ | 0.622 | $9.54 \times 10^{-2}$ | 0.883 |
|                                         | 10    | 33.49                   | 6.45  | 22.56 | 20.42 | $8.89 \times 10^{-5}$ | 0.996 | $0.14 \times 10^{-3}$ | 0.659 | $0.74 \times 10^{-6}$ | 0.865 |
| half-cell Li P/AB<br>Org <sub>FEC</sub> | 1     | 5.60                    | 1.04  | 10.16 | 2.45  | $2.74 \times 10^{-5}$ | 0.329 | $0.23 \times 10^{-3}$ | 0.634 | $4.30 \times 10^{-2}$ | 0.512 |
|                                         | 3     | 6.68                    | 0.91  | 5.91  | 2.39  | $2.21 \times 10^{-5}$ | 0.935 | $0.13 \times 10^{-3}$ | 0.697 | $3.90 \times 10^{-2}$ | 0.318 |
|                                         | 10    | 7.13                    | 0.64  | 8.06  | 1.58  | $6.19 \times 10^{-5}$ | 0.727 | $2.45 \times 10^{-3}$ | 0.563 | $5.23 \times 10^{-3}$ | 0.564 |
| half-cell Li P/AB<br>IL <sub>2:8</sub>  | 1     | 10.84                   | 3.88  | 0.91  | 0.25  | $4.57 \times 10^{-5}$ | 0.835 | $0.30 \times 10^{-3}$ | 0.493 | $0.88 \times 10^{-3}$ | 0.558 |
|                                         | 3     | 1.58                    | 3.51  | 4.23  | 0.00  | $8.45 \times 10^{-5}$ | 0.776 | $2.20 \times 10^{-5}$ | 0.012 | $9.94 \times 10^{-2}$ | 0.016 |
|                                         | 10    | 4.76                    | 5.31  | 0.99  | 1.52  | $1.91 \times 10^{-5}$ | 0.845 | $7.81 \times 10^{-3}$ | 0.952 | $1.95 \times 10^{-2}$ | 0.449 |

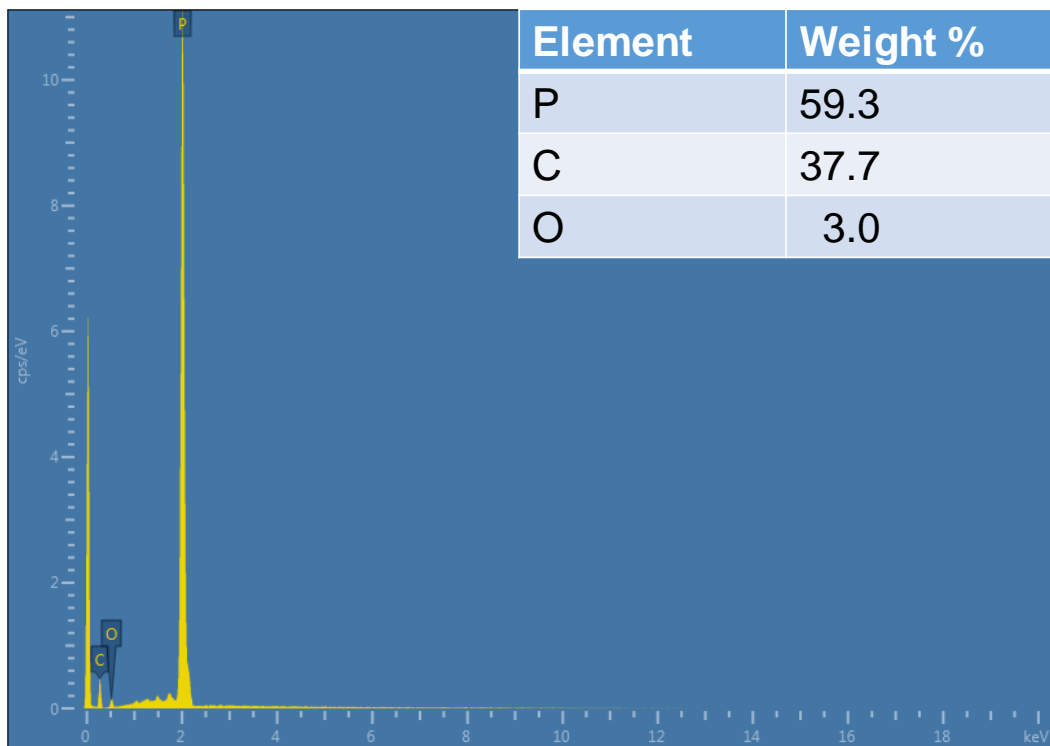

**Figure S1.** The EDX spectrum of the P/AB powder prepared by high-energy ball milling of red P and AB (6:4 in weight) at 900 rpm for 3 h. The resulting elemental compositions are summarized in the inset table.

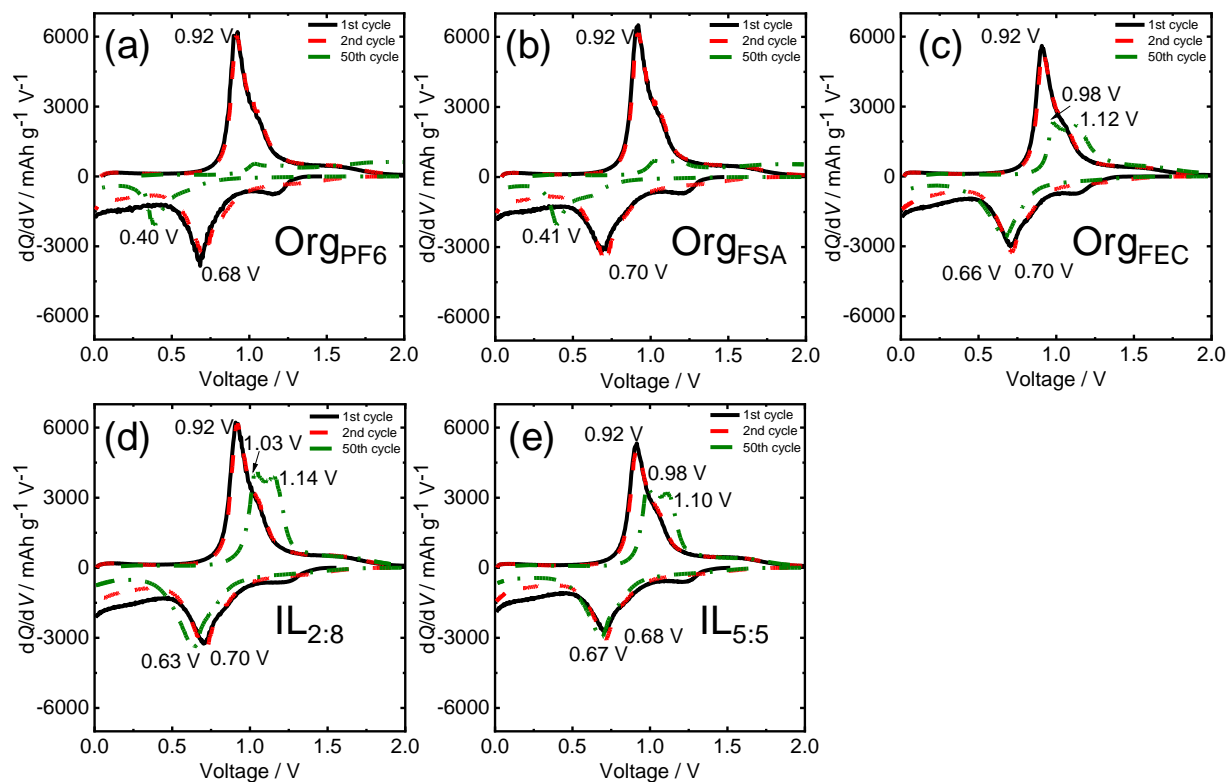

**Figure S2.** The  $dQ/dV$  plots obtained from the charge-discharge curves of the Li|P/AB half cells using (a) OrgPF<sub>6</sub>, (b) OrgFSA, (c) OrgFEC, (d) IL<sub>2:8</sub>, and (e) IL<sub>5:5</sub>. The corresponding charge-discharge curves are shown in Figure 2. Current density = 250 mA g<sup>-1</sup> (1-3 cycles) and 500 mA g<sup>-1</sup> (4-50 cycles) and cut-off voltage = 0.005–2.0 V. The capacity is calculated based on the weight of the P/AB composite.

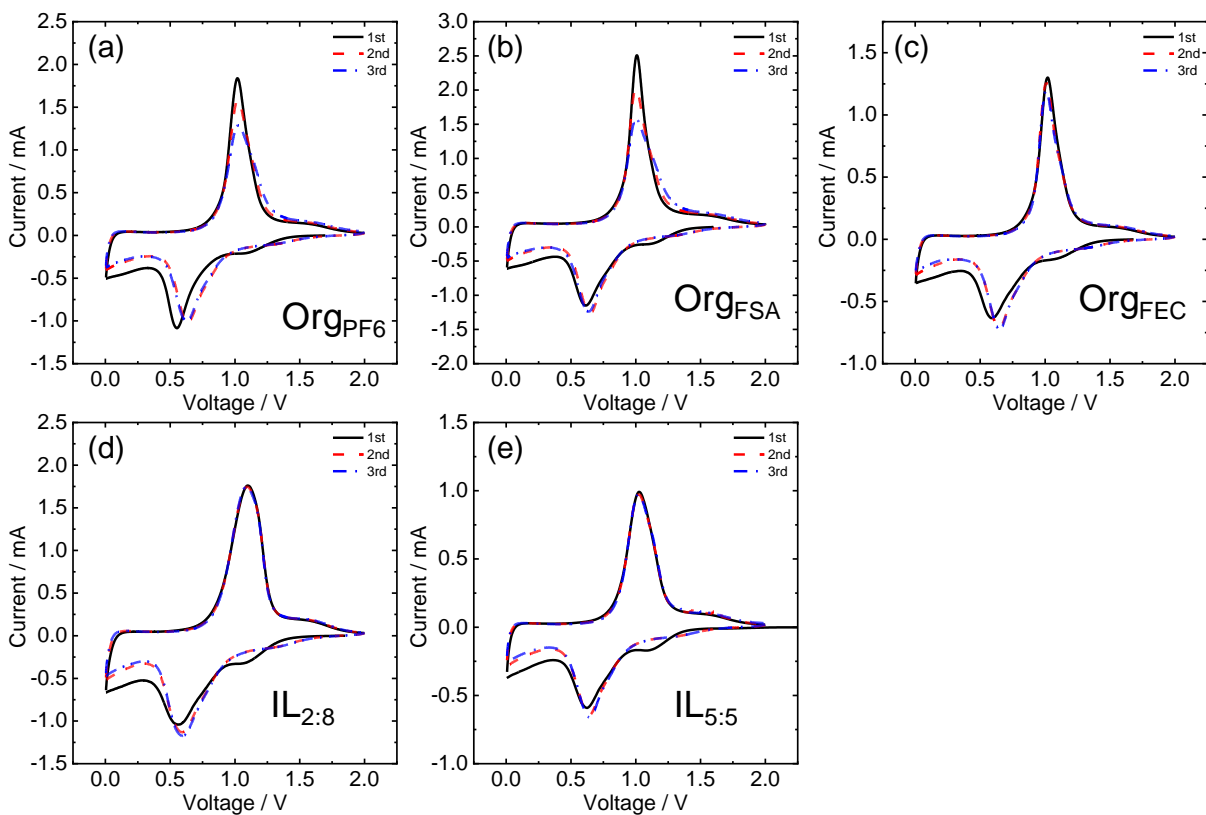

**Figure S3.** Cyclic voltammograms of the Li|P/AB cells during the first three cycles using (a) OrgPF<sub>6</sub>, (b) OrgFSA, (c) OrgFEC, (d) IL<sub>2:8</sub>, and (e) IL<sub>5:5</sub>. Scan rate = 0.1 mV s<sup>-1</sup>; cut-off voltage = 0.005–2.0 V.

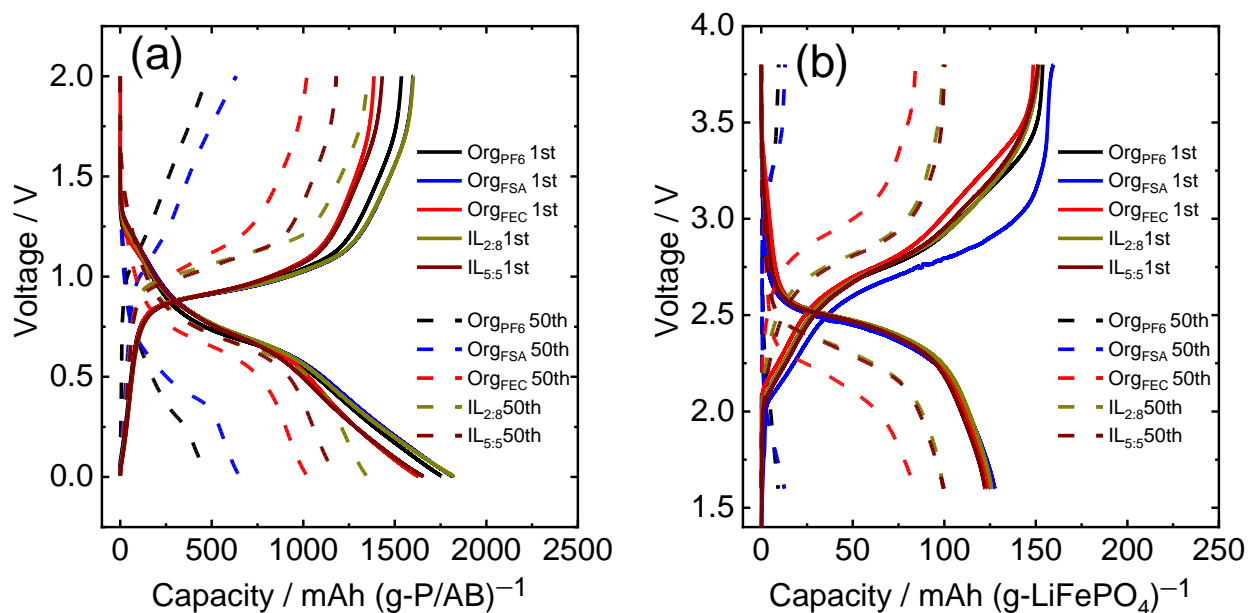

**Figure S4.** Galvanostatic charge-discharge curves of the (a) Li|P/AB half cells (current density = 250 mA g-(P/AB)<sup>-1</sup> for 1st cycle and 500 mA g-(P/AB)<sup>-1</sup> for 50th cycle; cut-off voltage = 0.005–2.0 V) and (b) P/AB|LiFePO<sub>4</sub> full cells (1st and 50th cycle) using Org<sub>PF6</sub>, Org<sub>FSA</sub>, Org<sub>FEC</sub>, IL<sub>2:8</sub>, and IL<sub>5:5</sub> electrolytes (current density = 16 mA g-(LiFePO<sub>4</sub>)<sup>-1</sup> for the 1st cycle and 80 mA g-(LiFePO<sub>4</sub>)<sup>-1</sup> for the 50th cycle; cut-off voltage = 1.6–3.8 V). The curves at the 1st and 50th cycles are shown in continuous and dashed lines, respectively, with the same color.

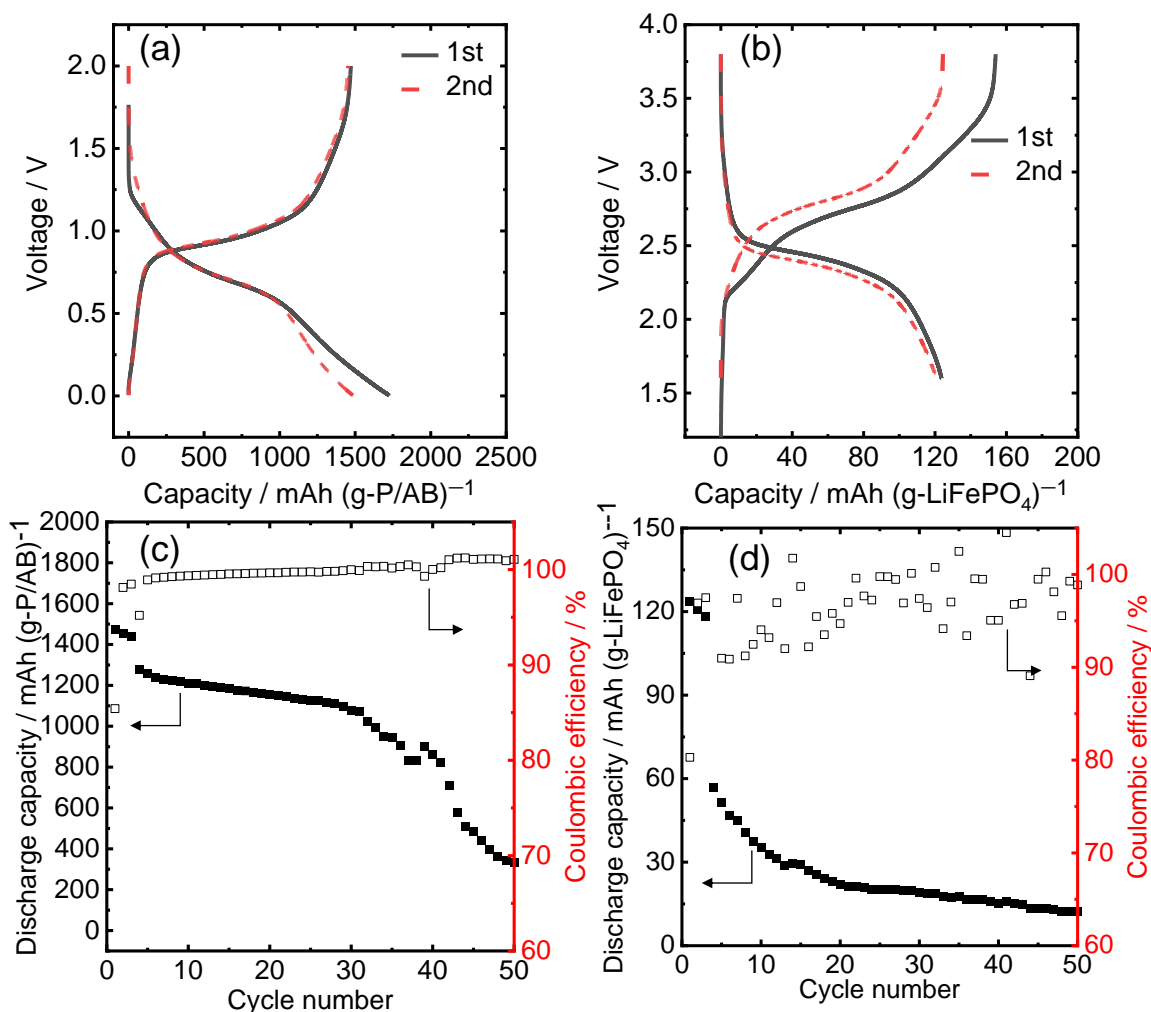

**Figure S5.** Electrochemical performance of Li|P/AB half cells and P/AB|LiFePO<sub>4</sub> full cells using 1 M Li[PF<sub>6</sub>] in EC:DMC 3 wt% FEC. Galvanostatic charge-discharge curves of the (a) Li|P/AB half cells (current density = 250 mA g-(P/AB)<sup>-1</sup>; cut-off voltage = 0.005–2.0 V) and (b) P/AB|LiFePO<sub>4</sub> full cells, (current density = 16 mA g-(LiFePO<sub>4</sub>)<sup>-1</sup>; cut-off voltage = 1.6–3.8 V). Cycle test of the (c) Li|P/AB half cells (Current density: 1-3 cycles = 250 mA (g-P/AB)<sup>-1</sup>, 4-50 cycles = 500 mA (g-P/AB)<sup>-1</sup>; cut-off voltage = 0.005–2.0 V) and (d) P/AB|LiFePO<sub>4</sub> full cells, (Current density: 1-3 cycles = 16 mA (g-LiFePO<sub>4</sub>)<sup>-1</sup>, 4-50 cycles = 80 mA (g-LiFePO<sub>4</sub>)<sup>-1</sup>; cut-off voltage = 1.6–3.8 V).

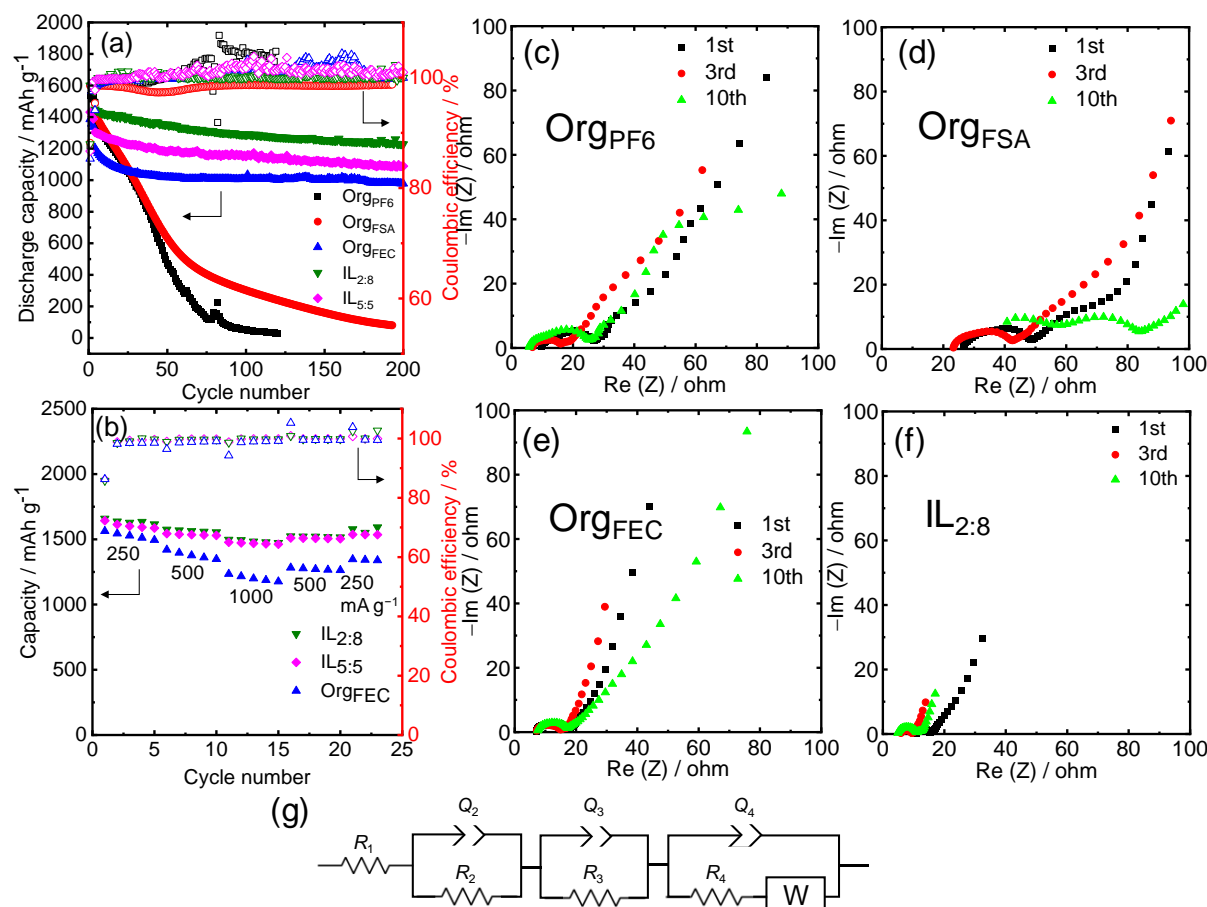

**Figure S6.** Electrochemical performance of the Li|P/AB half cell and the results of EIS tests during cycling. (a) Cycle performance with OrgPF<sub>6</sub>, OrgFSA, OrgFEC, IL<sub>2:8</sub>, and IL<sub>5:5</sub> (Current density: 1-3 cycles = 250 mA (g-P/AB)<sup>-1</sup>, 4-200 cycles = 500 mA (g-P/AB)<sup>-1</sup>; cut-off voltage = 0.005–2.0 V). (b) Rate performance with OrgFEC, IL<sub>2:8</sub> and IL<sub>5:5</sub> (Current density: 250–1000 mA (g-P/AB)<sup>-1</sup>; cut-off voltage = 0.005–2.0 V). Nyquist plots with (c) OrgPF<sub>6</sub>, (d) OrgFSA, (e) OrgFEC, and (f) IL<sub>2:8</sub>. EIS was measured at 0.5 V in the charging step of the 2nd, 4th and 11th cycle. (g) Equivalent circuit used for fitting all the EIS Nyquist plots (see Table S1 for the fitted parameters).

### Discussion related to Figure S6

In the half-cell cycle test (Figure S6a), capacity fades quickly with OrgPF<sub>6</sub> and OrgFSA. The capacity retention improves after adding FEC additive retaining 81.2 % capacity after 200 cycles. Among these organic electrolytes, OrgPF<sub>6</sub> exhibits Coulombic efficiencies over 100 %, owing to active material pulverization resulting in electrolyte decomposition, which is in contrast to the case of OrgFSA whose Coulombic efficiencies are kept below 100 %. Both the IL<sub>2:8</sub> and IL<sub>5:5</sub> provide high capacity retentions of 84.7 and 82.9 % after 200 cycles with an average Coulombic efficiencies of 100 %. This high capacity retention facilitated by the use of IL electrolytes is unprecedented for phosphorus-based materials for LIBs without employing any complicated fabrication. Figure S6b



shows similar rate capability with IL<sub>2:8</sub> and IL<sub>5:5</sub>, displaying 1473 and 1463 mAh g<sup>-1</sup> at 1000 mA g<sup>-1</sup>. Rate capability with Org<sub>FEC</sub> is slightly inferior to those with IL electrolytes (1176 mAh g<sup>-1</sup> at 1000 mA g<sup>-1</sup>). Figure S6 (c-f) shows Nyquist plots of the Li|P/AB (1st, 3rd and 10th cycle) half cell using (a) Org<sub>PF6</sub>, (b) Org<sub>FSA</sub>, (c) Org<sub>FEC</sub>, and (d) IL<sub>2:8</sub>, respectively. The EIS Nyquist plots were fitted using the equivalent circuit shown in Figure S6g and the fitted parameters are listed in Table S1. The circuit consists of four resistances  $R_1$ ,  $R_2$ ,  $R_3$ ,  $R_4$ , and Warburg resistance at low frequency, where  $R_1$  represents the bulk resistance,  $R_2$  denotes the SEI layer resistance at high characteristic frequency (>4000 Hz), and  $R_3$  and  $R_4$  corresponds to the interfacial resistance at medium frequency range (1–500 Hz). Two resistances are used for interfacial behavior for better fitting purpose. In half-cell EIS spectra of Org<sub>PF6</sub>, Org<sub>FSA</sub>, and Org<sub>FEC</sub>, the interfacial resistance decreased after the 3rd cycle (Org<sub>PF6</sub>:  $R_2 = 10.16$ ,  $R_3 = 1.53$ ,  $R_4 = 1.08$  ohm; Org<sub>FSA</sub>:  $R_2 = 7.01$ ,  $R_3 = 14.15$ ,  $R_4 = 2.29$  ohm; Org<sub>FEC</sub>:  $R_2 = 0.91$ ,  $R_3 = 5.91$ ,  $R_4 = 2.39$  ohm) but increased after 10th cycle (Org<sub>PF6</sub>:  $R_2 = 17.08$ ,  $R_3 = 1.78$ ,  $R_4 = 0.42$  ohm; Org<sub>FSA</sub>:  $R_2 = 6.45$ ,  $R_3 = 22.56$ ,  $R_4 = 20.42$  ohm; Org<sub>FEC</sub>:  $R_2 = 0.64$ ,  $R_3 = 8.06$ ,  $R_4 = 1.58$  ohm), respectively as compared to 1st cycle (Org<sub>PF6</sub>:  $R_2 = 3.69$ ,  $R_3 = 13.75$ ,  $R_4 = 0.97$  ohm; Org<sub>FSA</sub>:  $R_2 = 9.38$ ,  $R_3 = 15.33$ ,  $R_4 = 0.07$  ohm; Org<sub>FEC</sub>:  $R_2 = 0.64$ ,  $R_3 = 8.06$ ,  $R_4 = 1.58$  ohm), whereas, a constant decrease till 10th cycle was observed IL<sub>2:8</sub>.

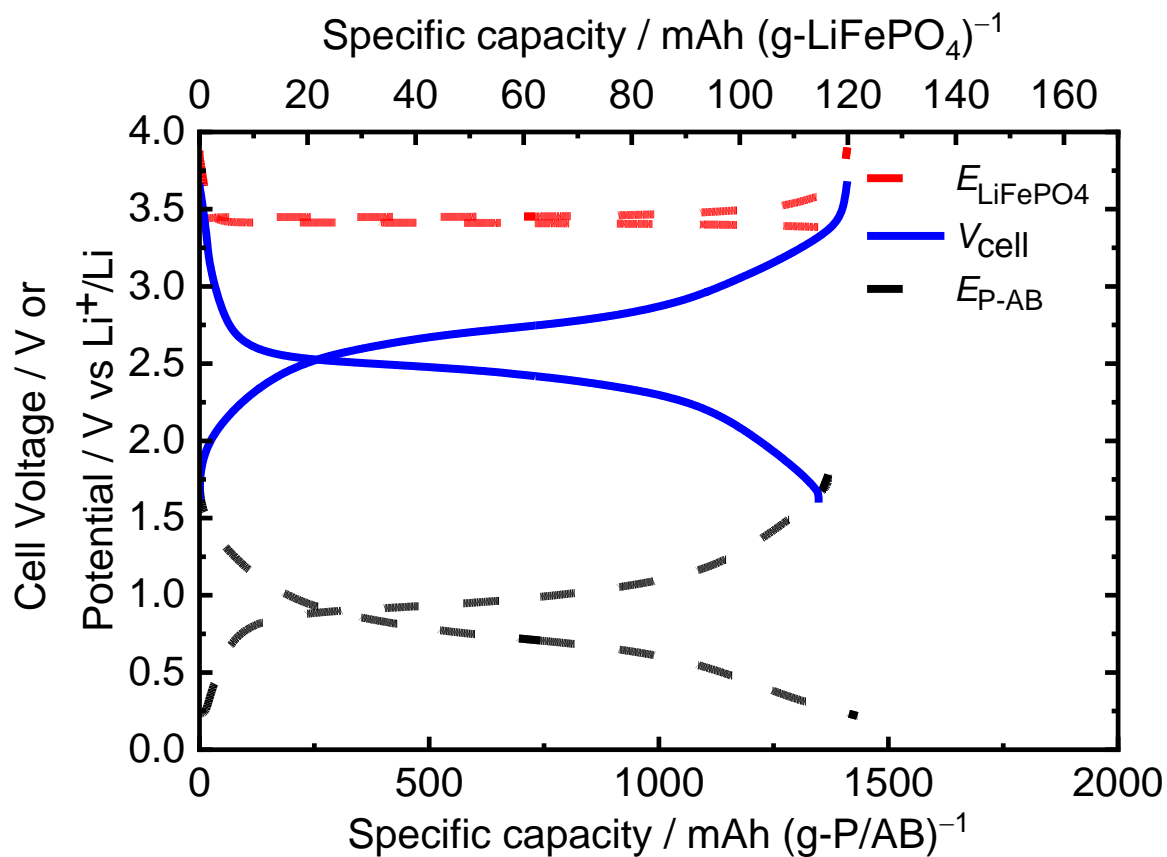

**Figure S7.** First cycle galvanostatic charge-discharge curves of the P/AB|LiFePO<sub>4</sub> full-cell with IL<sub>2.8</sub> in a three-electrode setup. Current density = 16 mA g-(LiFePO<sub>4</sub>)<sup>-1</sup>. The legends,  $V_{\text{Cell}}$ ,  $E_{\text{LiFePO}_4}$ , and  $E_{\text{P-AB}}$ , denote the cell voltage and the potentials of the LiFePO<sub>4</sub> positive and P/AB negative electrodes, respectively.

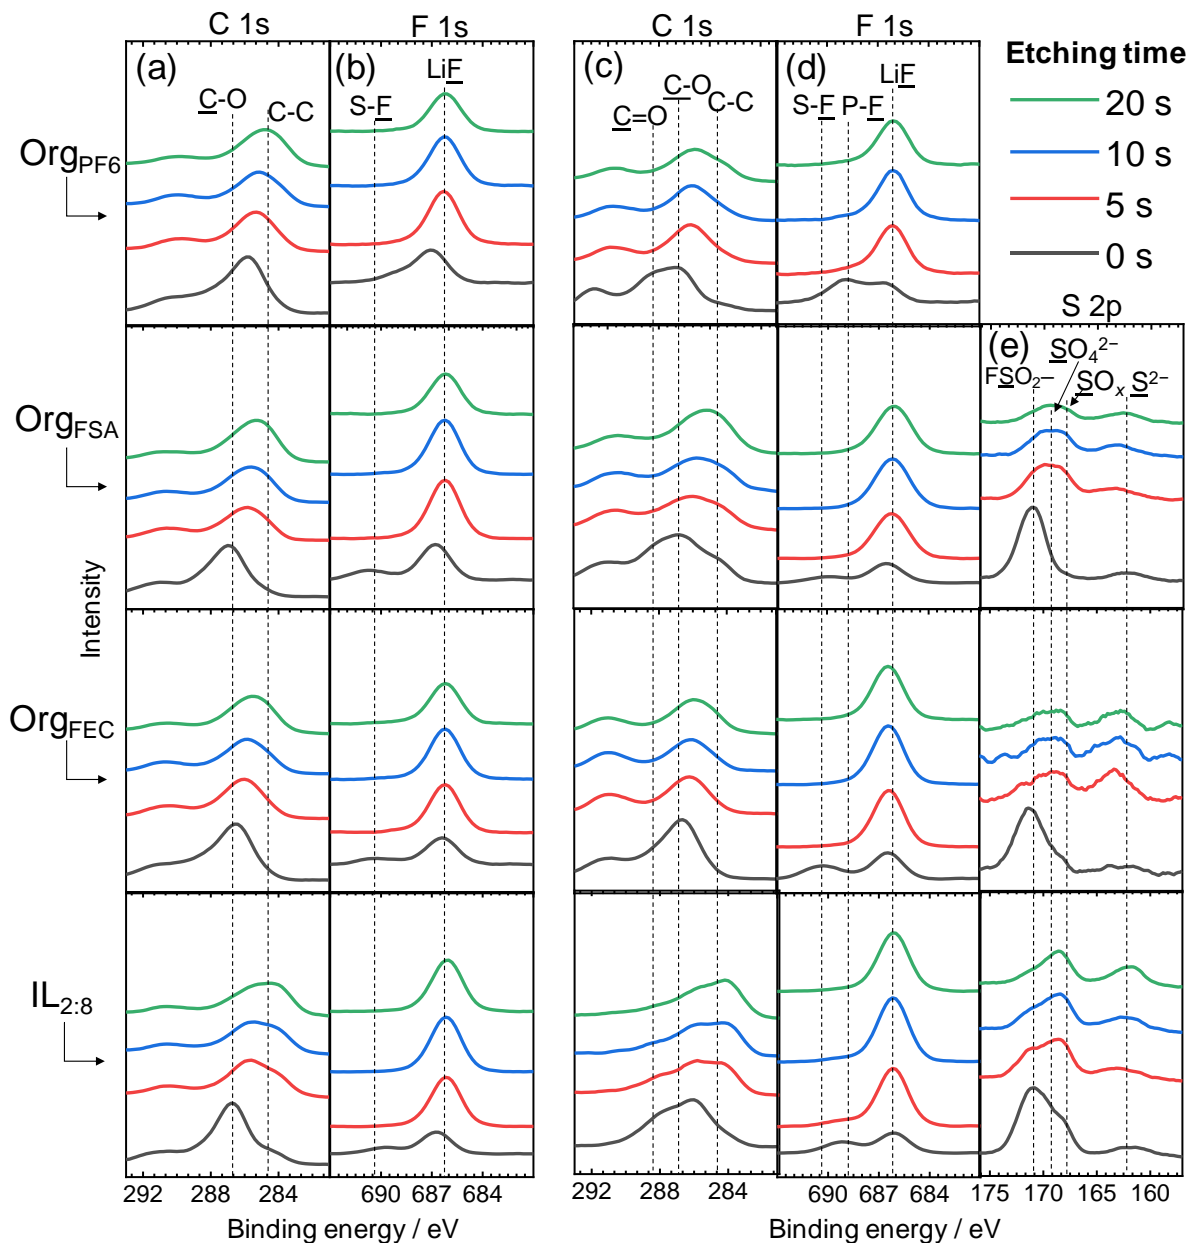

**Figure S8.** XPS spectra of the P/AB electrode with Ar etching after (a,b) 1<sup>st</sup> cycle and (c-e) 50<sup>th</sup> cycle in the C 1s, F 1s and S 2p regions, respectively, using OrgPF<sub>6</sub>, OrgFSA, OrgFEC and IL<sub>2:8</sub> electrolytes in the 1<sup>st</sup>, 2<sup>nd</sup>, 3<sup>rd</sup>, and 4<sup>th</sup> rows respectively.

### Discussion related to Figure S8

Figure S8a shows the C 1s spectra after 0, 5, 10, and 20-second etching. The surface without etching is mostly covered by C–O species as denoted by a peak at 286.7 eV<sup>1</sup>. Just 5-second etching results in peak shifting to the lower binding energy and C–C (284.6 eV) species are present in different concentrations according to the electrolyte decomposition. The F 1s spectra (Figure S8b) predominantly consist of LiF (685 eV) in all the electrolytes which is commonly observed in the

SEI layer in LIBs.<sup>2</sup> A small peak of S–F present in F 1s spectrum at 0 s was also confirmed in the S 2p spectrum, which indicates the reaction of F from FSA<sup>–</sup> decomposition with organic components. After 50 cycles, further decomposition of electrolytes can be observed. In the C 1s spectra (Figure S8c), a shoulder at 288 eV related to C=O can be observed in Org<sub>PF6</sub>, Org<sub>FSA</sub>, and IL<sub>2:8</sub> but not in Org<sub>FEC</sub>, indicating that decomposition of FEC in the early stage passivated the electrode and prevented decomposition of carbonate solvents. After etching for 5 s, the C=O layer was stripped off in all the cases, but Org<sub>PF6</sub>, Org<sub>FSA</sub>, and Org<sub>FEC</sub> do not show significant changes with further etching. On the other hand, IL<sub>2:8</sub> shows evolution of C–C peak with increasing etching time. Figure S8d shows the F 1s spectra after 50 cycles for each electrolyte. The spectrum of Org<sub>PF6</sub> at 0 s shows distinct peaks around 688.5 eV for the P–F bond in Li<sub>x</sub>F<sub>y</sub>PO<sub>z</sub>,<sup>3</sup> and around 685 eV for LiF. After 5-second etching, only LiF peak is observed and further etching did not produce any changes. Other F 1s spectra showed C–F bond peak and LiF peak similar to that after 1st cycle at 0 s, and the C–F peak disappears after 5-second etching. In the S 2p spectra after 50 cycles (Figure S8e), Org<sub>FSA</sub>, and Org<sub>FEC</sub> show similar spectra to that after 1st cycle, whereas IL<sub>2:8</sub> shows a relatively stronger peak at a high binding energy compared to that at 1st cycle. However, after etching for 20 s, the peak of S<sup>2–</sup> is observable, indicating there is a slight increase in the thickness of SEI layer in IL electrolyte after 50 cycles.

**Table S2** Binding energies of the chemical species detected in XPS spectra (Figure S8).

| Species                       | Binding energy / eV |       |       |
|-------------------------------|---------------------|-------|-------|
|                               | C1s                 | F1s   | S2p   |
| C–C                           | 284.6               | -     | -     |
| C–O                           | 286.7               | -     | -     |
| C=O                           | 288.0               | -     | -     |
| S–F                           | -                   | 690.5 | 171.5 |
| LiF                           | -                   | 685.0 | -     |
| P–F                           | -                   | 688.5 | -     |
| FSO <sub>2</sub> <sup>–</sup> | -                   | 690.5 | 171.5 |
| SO <sub>4</sub> <sup>2–</sup> | -                   | -     | 169.4 |
| S <sup>2–</sup>               | -                   | -     | 162.4 |

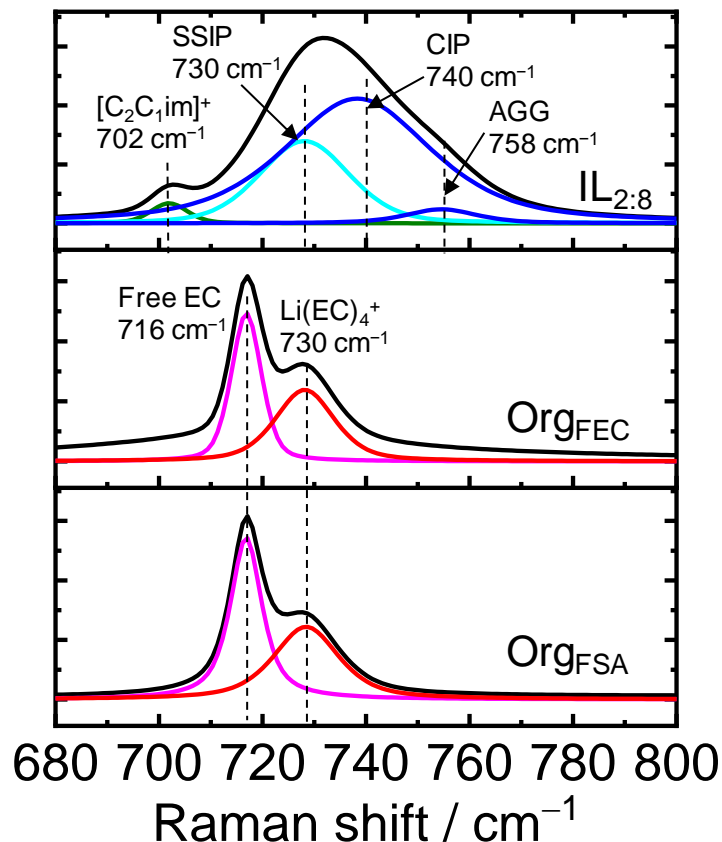

**Figure S9.** Raman spectra of the Org<sub>FSA</sub>, Org<sub>FEC</sub>, and IL<sub>2:8</sub> electrolytes.

#### Discussion related to Figure S9:

This range in Raman spectra corresponds to the ring-bending mode of EC and S-N-S bending mode of FSA<sup>−</sup> which shift, depending on their coordination states. In Org<sub>FSA</sub> and Org<sub>FEC</sub>, the spectrum is deconvoluted into two peaks at 716 and 730 cm<sup>−1</sup> assigned to the ring-bending vibration of free EC molecule and Li-ion coordinated EC molecule in the form of Li(EC)<sub>4</sub><sup>+</sup> (the latter overlaps with the peak for free FSA<sup>−</sup> as mentioned below).<sup>4</sup> On the other hand, the Raman spectrum of IL<sub>2:8</sub> shows four deconvoluted peak at 702, 730, 740, and 758 cm<sup>−1</sup> correlated to the C<sub>2</sub>C<sub>1</sub>im<sup>+</sup> (at 702 cm<sup>−1</sup>), free FSA<sup>−</sup> (at 730 cm<sup>−1</sup>), and Li-coordinated FSA<sup>−</sup> (contact ion pair (CIP) at 740 and aggregating (AGG) at 758 cm<sup>−1</sup>), respectively.<sup>5</sup> It should be noted that the absence of the peaks at 740 and 758 cm<sup>−1</sup> in Org<sub>FEC</sub> and Org<sub>FSA</sub> suggest that these electrolytes do not contain the Li ion coordinated by FSA<sup>−</sup>. This result suggests that the coordination sphere of Li<sup>+</sup> ion is different in the organic and IL electrolytes; Li<sup>+</sup> is coordinated by solvent molecules decreasing its energy of lower unoccupied molecular orbital in the organic electrolyte, promoting reductive decomposition of solvent. On the other hand, the coordination of Li<sup>+</sup> by FSA<sup>−</sup> anion in the IL electrolyte, promotes reductive decomposition of FSA<sup>−</sup> anion enabling sulfur based SEI layer formation as observed in XPS result.

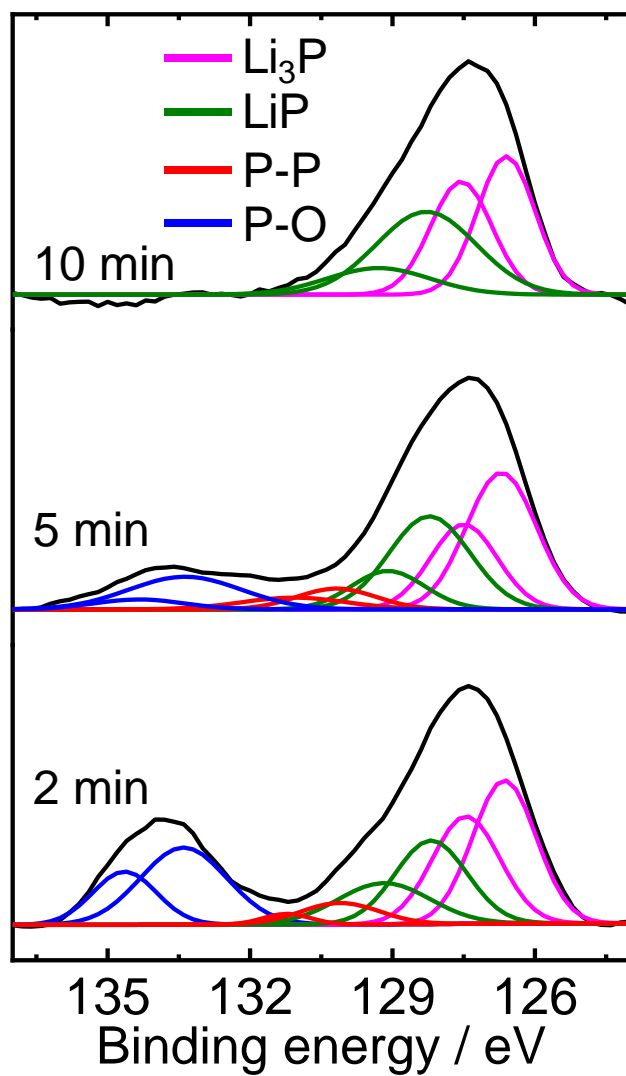

**Figure S10.** The P 2p XPS of the P/AB electrode after charging to 0.005 V at various Ar etching time of 2, 5 and 10 minutes.

## References

1. Shchukarev, A.; Korolkov, D., XPS Study of group IA carbonates. *Open Chemistry* **2004**, 2 (2), 347-362.
2. Hennessy, J.; Nikzad, S., Atomic Layer Deposition of Lithium Fluoride Optical Coatings for the Ultraviolet. *Inorganics* **2018**, 6 (2), 46.
3. Wang, L.; Ma, J.; Wang, C.; Yu, X.; Liu, R.; Jiang, F.; Sun, X.; Du, A.; Zhou, X.; Cui, G., A Novel Bifunctional Self-Stabilized Strategy Enabling 4.6 V LiCoO<sub>2</sub> with Excellent Long-Term Cyclability and High-Rate Capability. *Adv. Sci.* **2019**, 6 (12), 1900355.
4. Mukai, K.; Inoue, T.; Kato, Y.; Shirai, S., Superior Low-Temperature Power and Cycle Performances of Na-Ion Battery over Li-Ion Battery. *ACS Omega* **2017**, 2 (3), 864-872.
5. Kerner, M.; Plylahan, N.; Scheers, J.; Johansson, P., Ionic liquid based lithium battery electrolytes: fundamental benefits of utilising both TFSI and FSI anions? *Phys. Chem. Chem. Phys.* **2015**, 17 (29), 19569-19581.
